# Supplementary material for: Alcohol and Smoking Cessation as Potential Modulators for Smoking-Associated Psoriasis Risk in Postmenopausal Women: The Women’s Health Initiative
Source: Springer Nature journal article supplement (doi:10.1007/s40257-022-00750-8), 2023-01-20

**TITLE:** Alcohol and smoking cessation as potential modulators for smoking-associated psoriasis risk in postmenopausal women: the Women's Health Initiative

**Authors:** Wendy Li, MD<sup>1\*</sup>, Alfred A. Chan, BS<sup>2\*</sup>, Jiali Han, PhD<sup>3</sup>, Rowan T Chlebowski, MD, PhD<sup>2</sup>, Delphine J. Lee, MD, PhD<sup>1, 2, 4</sup>

**American Journal of Clinical Dermatology, 2022**

**Supplemental Table 1: Baseline characteristics by alcohol consumption habits**

|                       |                              | <b>Non-<br/>Drinker</b>                            | <b>Past<br/>Drinker</b> | <b>&lt;1<br/>Drink/Mont<br/>h</b> | <b>&lt;1<br/>Drink/Wee<br/>k</b> | <b>1 to 6<br/>Drinks/Week</b> | <b>&gt;= 7<br/>Drinks/Week</b> |
|-----------------------|------------------------------|----------------------------------------------------|-------------------------|-----------------------------------|----------------------------------|-------------------------------|--------------------------------|
| <b>Age</b>            | <60                          | 176<br>(14.0%)                                     | 503<br>(40.1%)          | 175 (14.0%)                       | 207<br>(16.5%)                   | 138 (11.0%)                   | 55 (4.4%)                      |
|                       | 60 - 64                      | 444<br>(11.5%)                                     | 875<br>(22.8%)          | 493 (12.8%)                       | 794<br>(20.7%)                   | 870 (22.6%)                   | 369 (9.6%)                     |
|                       | 65 - 69                      | 7713<br>(10.5%)                                    | 12700<br>(17.2%)        | 9396<br>(12.7%)                   | 15005<br>(20.4%)                 | 20038 (27.2%)                 | 8849 (12.0%)                   |
|                       | 70 - 74                      | 2350<br>(12.9%)                                    | 3608<br>(19.8%)         | 2073<br>(11.4%)                   | 3606<br>(19.8%)                  | 4370 (24.0%)                  | 2231 (12.2%)                   |
|                       | 75 - 80                      | 1207<br>(14.8%)                                    | 1738<br>(21.3%)         | 867 (10.6%)                       | 1620<br>(19.8%)                  | 1834 (22.5%)                  | 902 (11.0%)                    |
|                       | >80                          | 212<br>(12.9%)                                     | 340<br>(20.8%)          | 196 (12.0%)                       | 323<br>(19.7%)                   | 381 (23.3%)                   | 186 (11.4%)                    |
| <b>Race/Ethnicity</b> | Caucasian                    | 8902<br>(9.7%)                                     | 17359<br>(18.9%)        | 11051<br>(12.1%)                  | 17034<br>(18.6%)                 | 25281 (27.6%)                 | 12043 (13.1%)                  |
|                       | Asian or Pacific<br>Islander | 982<br>(40.7%)                                     | 537<br>(22.2%)          | 340<br>(14.1%)                    | 279<br>(11.6%)                   | 219 (9.1%)                    | 57 (2.4%)                      |
|                       | Black or African<br>American | 1653<br>(18.4%)                                    | 3342<br>(37.2%)         | 1172<br>(13.0%)                   | 1287<br>(14.3%)                  | 1171 (13.0%)                  | 357 (4.0%)                     |
|                       | Hispanic or Latino           | 685<br>(22.0%)                                     | 820<br>(26.3%)          | 423<br>(13.6%)                    | 509<br>(16.3%)                   | 529 (17.0%)                   | 151 (4.8%)                     |
|                       | Other/Unspecified            | 247<br>(16.6%)                                     | 393<br>(26.5%)          | 187<br>(12.6%)                    | 238<br>(16.0%)                   | 298 (20.1%)                   | 122 (8.2%)                     |
|                       | <b>Education</b>             | High School of Less<br>School After High<br>School | 1201<br>(24.7%)         | 1843<br>(38.0%)                   | 563 (11.6%)                      | 538<br>(11.1%)                | 525 (10.8%)                    |
| College Degree        |                              | 4042<br>(9.8%)                                     | 8193<br>(19.8%)         | 5093<br>(12.3%)                   | 7550<br>(18.2%)                  | 11090 (26.8%)                 | 5403 (13.1%)                   |
| College Degree        |                              | 4435<br>(15.3%)                                    | 7280<br>(25.0%)         | 4062<br>(14.0%)                   | 4967<br>(17.1%)                  | 5921 (20.4%)                  | 2401 (8.3%)                    |

|                           |                         |                 |                 |                 |                 |               |              |
|---------------------------|-------------------------|-----------------|-----------------|-----------------|-----------------|---------------|--------------|
| <b>Occupation</b>         | Graduate Degree         | 2739<br>(8.5%)  | 5074<br>(15.8%) | 3426<br>(10.7%) | 6246<br>(19.5%) | 9873 (30.8%)  | 4705 (14.7%) |
|                           | Managerial/Professional | 3812<br>(8.8%)  | 7440<br>(17.2%) | 4917 (11.4%)    | 8315<br>(19.2%) | 12730 (29.5%) | 5997 (13.9%) |
|                           | Technical/Sales/Admin   | 3165<br>(10.9%) | 6353<br>(21.9%) | 3965<br>(13.7%) | 5401<br>(18.6%) | 7013 (24.2%)  | 3104 (10.7%) |
|                           | Service/Labor           | 2671<br>(15.9%) | 4490<br>(26.8%) | 2162<br>(12.9%) | 2550<br>(15.2%) | 3384 (20.2%)  | 1507 (9.0%)  |
|                           | Homemaker Only          | 1632<br>(16.0%) | 2253<br>(22.2%) | 1083<br>(10.6%) | 1566<br>(15.4%) | 2356 (23.2%)  | 1280 (12.6%) |
| <b>Income</b>             | <20k - 35k              | 2934<br>(19.2%) | 5067<br>(33.2%) | 2024 (13.3%)    | 2154<br>(14.1%) | 2222 (14.6%)  | 861 (5.6%)   |
|                           | 35 - 50k                | 3159<br>(13.2%) | 5976<br>(24.9%) | 3258<br>(13.6%) | 4265<br>(17.8%) | 5227 (21.8%)  | 2127 (8.9%)  |
|                           | 50 - 75k                | 2283<br>(10.9%) | 4074<br>(19.5%) | 2805<br>(13.4%) | 3969<br>(19.0%) | 5418 (25.9%)  | 2364 (11.3%) |
|                           | 75 - 100k               | 1940<br>(9.4%)  | 3417<br>(16.5%) | 2510<br>(12.1%) | 4055<br>(19.6%) | 5901 (28.5%)  | 2876 (13.9%) |
|                           | >100k                   | 668<br>(6.9%)   | 1337<br>(13.9%) | 1032<br>(10.7%) | 1872<br>(19.4%) | 3154 (32.7%)  | 1582 (16.4%) |
| <b>Body Mass Index</b>    | Normal (18.5 - 24.9)    | 3622<br>(10.3%) | 5910<br>(16.8%) | 3370 (9.6%)     | 5953<br>(16.9%) | 10666 (30.2%) | 5752 (16.3%) |
|                           | Overweight (25 - 29.9)  | 4087<br>(11.2%) | 7222<br>(19.8%) | 4248<br>(11.7%) | 6828<br>(18.7%) | 9733 (26.7%)  | 4322 (11.9%) |
|                           | Obese (30+)             | 4228<br>(13.4%) | 8431<br>(26.8%) | 4999<br>(15.9%) | 5738<br>(18.2%) | 5957 (18.9%)  | 2099 (6.7%)  |
| <b>Waist to Hip Ratio</b> | Normal (<0.8)           | 5525<br>(10.9%) | 8967<br>(17.7%) | 5741 (11.3%)    | 9375<br>(18.5%) | 14744 (29.0%) | 6416 (12.6%) |
|                           | Overweight (0.8 - 0.85) | 3111<br>(11.8%) | 5552<br>(21.1%) | 3224<br>(12.3%) | 4784<br>(18.2%) | 6434 (24.5%)  | 3157 (12.0%) |
|                           | Obese (>0.85)           | 3640<br>(12.6%) | 7570<br>(26.2%) | 3991<br>(13.8%) | 4856<br>(16.8%) | 5898 (20.4%)  | 2944 (10.2%) |

|                                         |              |                  |                  |                  |                  |               |               |
|-----------------------------------------|--------------|------------------|------------------|------------------|------------------|---------------|---------------|
| <b>Hx of Hysterectomy</b>               | No           | 6676<br>(10.7%)  | 11756<br>(18.8%) | 7503 (12.0%)     | 11407<br>(18.2%) | 17080 (27.3%) | 8140 (13.0%)  |
|                                         | Yes          | 5819<br>(12.8%)  | 10748<br>(23.7%) | 5689<br>(12.6%)  | 7968<br>(17.6%)  | 10459 (23.1%) | 4608 (10.2%)  |
| <b>Physical Activity<br/>(MET-hour)</b> | 0            | 1134<br>(14.6%)  | 2078<br>(26.7%)  | 1138 (14.6%)     | 1297<br>(16.7%)  | 1386 (17.8%)  | 747 (9.6%)    |
|                                         | ≤3.5         | 986<br>(13.3%)   | 1860<br>(25.2%)  | 897 (12.1%)      | 1324<br>(17.9%)  | 1579 (21.4%)  | 741 (10.0%)   |
|                                         | >3.5 - ≥7    | 948<br>(12.8%)   | 1537<br>(20.8%)  | 920 (12.5%)      | 1287<br>(17.4%)  | 1831 (24.8%)  | 865 (11.7%)   |
|                                         | >7           | 3162<br>(9.6%)   | 5781<br>(17.5%)  | 3316<br>(10.1%)  | 5932<br>(18.0%)  | 9780 (29.6%)  | 5017 (15.2%)  |
| <b>Smoking (Pack years)</b>             | Never Smoker | 10641<br>(19.5%) | 10479<br>(19.2%) | 7357 (13.5%)     | 10095<br>(18.5%) | 12052 (22.1%) | 3901 (7.2%)   |
|                                         | <5           | 41<br>(4.0%)     | 168<br>(16.4%)   | 117 (11.4%)      | 185<br>(18.1%)   | 339 (33.1%)   | 174 (17.0%)   |
|                                         | 5 - <20      | 98<br>(5.9%)     | 368<br>(22.0%)   | 243 (14.5%)      | 291<br>(17.4%)   | 423 (25.3%)   | 250 (14.9%)   |
|                                         | ≥ 20         | 147<br>(3.4%)    | 1000<br>(23.5%)  | 626 (14.7%)      | 734<br>(17.2%)   | 953 (22.4%)   | 802 (18.8%)   |
| <b>Hx of Diabetes</b>                   | No           | 11367<br>(11.2%) | 19948<br>(19.6%) | 12379<br>(12.2%) | 18632<br>(18.3%) | 26930 (26.5%) | 12532 (12.3%) |
|                                         | Yes          | 1122<br>(18.5%)  | 2548<br>(42.1%)  | 809<br>(13.4%)   | 746<br>(12.3%)   | 617 (10.2%)   | 213 (3.5%)    |
| <b>Hx of Hypertension</b>               | No           | 7628<br>(10.7%)  | 13005<br>(18.3%) | 8638 (12.1%)     | 13203<br>(18.5%) | 19751 (27.7%) | 8975 (12.6%)  |
|                                         | Yes          | 4782<br>(13.3%)  | 9285<br>(25.8%)  | 4469<br>(12.4%)  | 6071<br>(16.9%)  | 7654 (21.3%)  | 3720 (10.3%)  |
| <b>Hx of Cardiovascular<br/>Disease</b> | No           | 9475<br>(11.4%)  | 16415<br>(19.7%) | 10297<br>(12.2%) | 15129<br>(18.1%) | 21954 (26.3%) | 10236 (12.3%) |
|                                         | Yes          | 2236<br>(12.2%)  | 4735<br>(25.8%)  | 2333 (12.4%)     | 3116<br>(17.0%)  | 4082 (22.3%)  | 1880 (10.2%)  |

|                                 |         |                  |                  |                  |                  |               |               |
|---------------------------------|---------|------------------|------------------|------------------|------------------|---------------|---------------|
| <b>Hx of Liver Disease</b>      | No      | 12160<br>(11.5%) | 21889<br>(20.8%) | 12884<br>(12.2%) | 18972<br>(18.0%) | 26973 (25.6%) | 12501 (11.9%) |
|                                 | Yes     | 340<br>(13.4%)   | 621<br>(24.5%)   | 314<br>(12.4%)   | 417<br>(16.5%)   | 585 (23.1%)   | 254 (10.0%)   |
| <b>Hx of Bleeding Diathesis</b> | No      | 12181<br>(11.6%) | 21840<br>(20.8%) | 12865<br>(12.2%) | 18895<br>(18.0%) | 26935 (25.6%) | 12442 (11.8%) |
|                                 | Yes     | 309<br>(11.5%)   | 650<br>(24.3%)   | 326<br>(12.2%)   | 484<br>(18.1%)   | 604 (22.5%)   | 306 (11.4%)   |
| <b>Hx of Stroke</b>             | No      | 12274<br>(11.5%) | 22068<br>(20.7%) | 13045<br>(12.2%) | 19193<br>(18.0%) | 27351 (25.7%) | 12646 (11.9%) |
|                                 | Yes     | 225<br>(17.1%)   | 438<br>(33.4%)   | 152<br>(11.6%)   | 192<br>(14.6%)   | 199 (15.2%)   | 106 (8.1%)    |
| <b>Hx of Skin Cancer</b>        | No      | 11403<br>(11.9%) | 20267<br>(21.1%) | 11910<br>(12.4%) | 17301<br>(18.0%) | 24137 (25.1%) | 10957 (11.4%) |
|                                 | Yes     | 1080<br>(9.2%)   | 2223<br>(18.9%)  | 1267<br>(10.7%)  | 2059<br>(17.5%)  | 3380 (28.7%)  | 1780 (15.1%)  |
| <b>Estrogen Use</b>             | Never   | 8103<br>(11.7%)  | 14164<br>(20.4%) | 8505 (12.3%)     | 12321<br>(17.8%) | 17832 (25.7%) | 8340 (12.0%)  |
|                                 | Past    | 1678<br>(12.0%)  | 3299<br>(23.6%)  | 1676<br>(12.0%)  | 2424<br>(17.3%)  | 3326 (23.8%)  | 1574 (11.3%)  |
|                                 | Current | 2717<br>(11.0%)  | 5039<br>(20.5%)  | 3008<br>(12.2%)  | 4628<br>(18.8%)  | 6377 (25.9%)  | 2837 (11.5%)  |
| <b>Estrogen + Progestin Use</b> | Never   | 10074<br>(12.6%) | 17922<br>(22.5%) | 10115<br>(12.7%) | 14088<br>(17.7%) | 18877 (23.7%) | 8738 (10.9%)  |
|                                 | Past    | 863<br>(9.3%)    | 1694<br>(18.3%)  | 1077<br>(11.7%)  | 1684<br>(18.2%)  | 2632 (28.5%)  | 1283 (13.9%)  |
|                                 | Current | 1565<br>(8.3%)   | 2893<br>(15.4%)  | 2005<br>(10.6%)  | 3609<br>(19.2%)  | 6037 (32.0%)  | 2732 (14.5%)  |
| <b>Estrogen-Alone Trial</b>     | Placebo | 523<br>(14.2%)   | 963<br>(26.2%)   | 535 (14.6%)      | 598 (16.3%)      | 733 (20.0%)   | 319 (8.7%)    |
|                                 | Treated | 512<br>(14.4%)   | 976<br>(27.5%)   | 496 (14.0%)      | 570 (16.1%)      | 689 (19.4%)   | 301 (8.5%)    |

|                                   |         |                 |                 |                 |                 |              |              |
|-----------------------------------|---------|-----------------|-----------------|-----------------|-----------------|--------------|--------------|
| <b>Estrogen + Progestin Trial</b> | Placebo | 689<br>(12.5%)  | 1014<br>(18.5%) | 776 (14.1%)     | 944 (17.2%)     | 1352 (24.6%) | 719 (13.1%)  |
|                                   | Treated | 704<br>(12.1%)  | 1126<br>(19.4%) | 796 (13.7%)     | 1045<br>(18.0%) | 1422 (24.5%) | 708 (12.2%)  |
| <b>Calcium-Vitamin D Trial</b>    | Placebo | 1386<br>(11.2%) | 2468<br>(19.9%) | 1720 (13.8%)    | 2330<br>(18.8%) | 3209 (25.8%) | 1307 (10.5%) |
|                                   | Treated | 1404<br>(11.3%) | 2432<br>(19.6%) | 1712<br>(13.8%) | 2323<br>(18.7%) | 3219 (26.0%) | 1309 (10.6%) |
| <b>Dietary Modification Trial</b> | Placebo | 1376<br>(10.3%) | 2662<br>(20.0%) | 1769 (13.3%)    | 2633<br>(19.7%) | 3578 (26.8%) | 1315 (9.9%)  |
|                                   | Treated | 2114<br>(10.7%) | 4049<br>(20.5%) | 2675<br>(13.5%) | 3819<br>(19.3%) | 5224 (26.4%) | 1895 (9.6%)  |

**Supplemental Figure 1: Polychoric correlation between alcohol consumption and smoking habits**

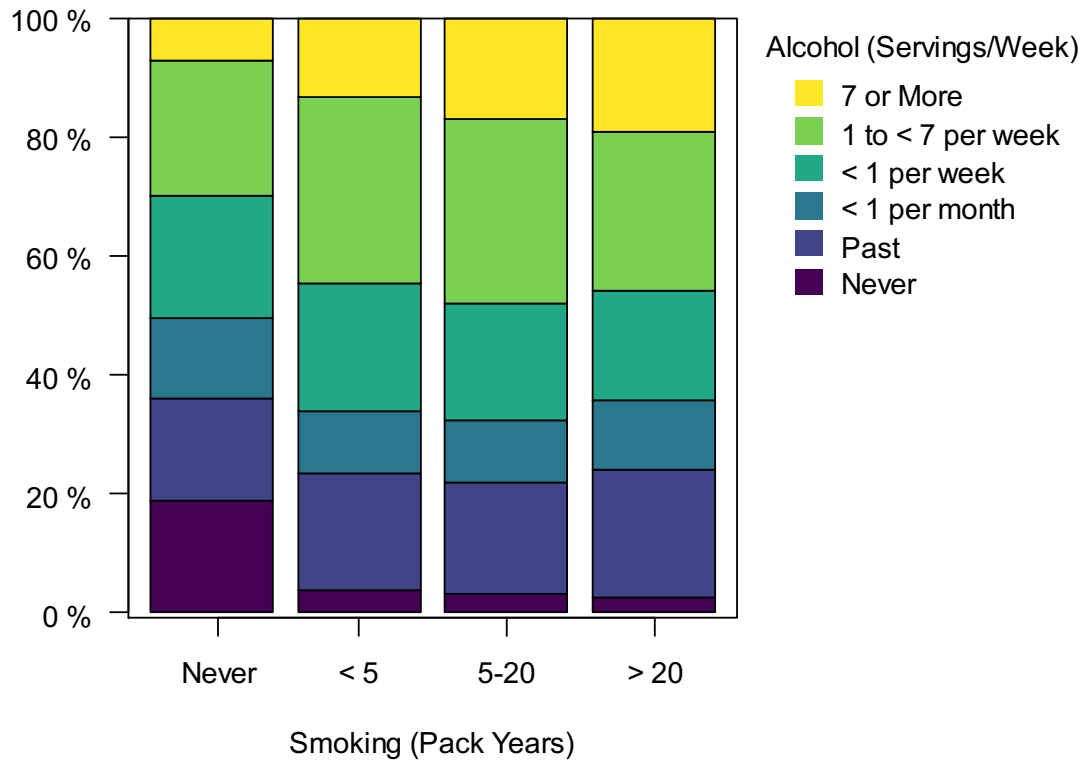

Supplement: MOESM1 [file 23942606]
